# Supplementary material for: Organically templated metal germanate: Ionothermal synthesis of (C8H24N4)[NbOGe6O13(OH)2F]
Source: Royal Society of Chemistry journal article supplement (doi:10.1039/c1dt11452b), 2011-01-01
Supplement: c1dt11452b.pdf [file c1dt11452b.pdf]

## Supporting Information

### Organically Templated Niobium Germanate: Ionothermal Synthesis of

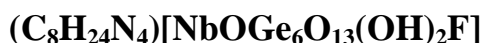

Quang Bac Nguyen<sup>a</sup> and Kwang-Hwa Lii<sup>\*,a,b</sup>

<sup>a</sup> Department of Chemistry, National Central University, Jhongli, Taiwan 320, R.O.C.

<sup>b</sup> Institute of Chemistry, Academia Sinica, Taipei, Taiwan 115, R.O.C.

**Figure S1.** The observed X-ray powder pattern (**a**) and simulated powder pattern based on the results from single-crystal X-ray diffraction (**b**) of the compound  $(\text{C}_8\text{H}_{24}\text{N}_4)[\text{NbOGe}_6\text{O}_{13}(\text{OH})_2\text{F}]$  (denote as **1**).

**Figure S2.** The infrared spectrum of **1** (KBr pellet method).

**Figure S3.** The thermogravimetric analysis of **1** in flowing  $\text{N}_2$  gas at a heating rate of  $5\text{ }^\circ\text{C min}^{-1}$ .

**Figure S4.** The response of second harmonic generation of **1** (blue curve) and that of KDP (red curve).

**Figure S5.** The structure of **1** viewed along the [011] direction to show 10-ring channels. The organic ammonium cations and the H atoms of the OH groups are not shown for clarity.

**Table S1.** Selected N...O distances showing hydrogen bonding interactions in **1**

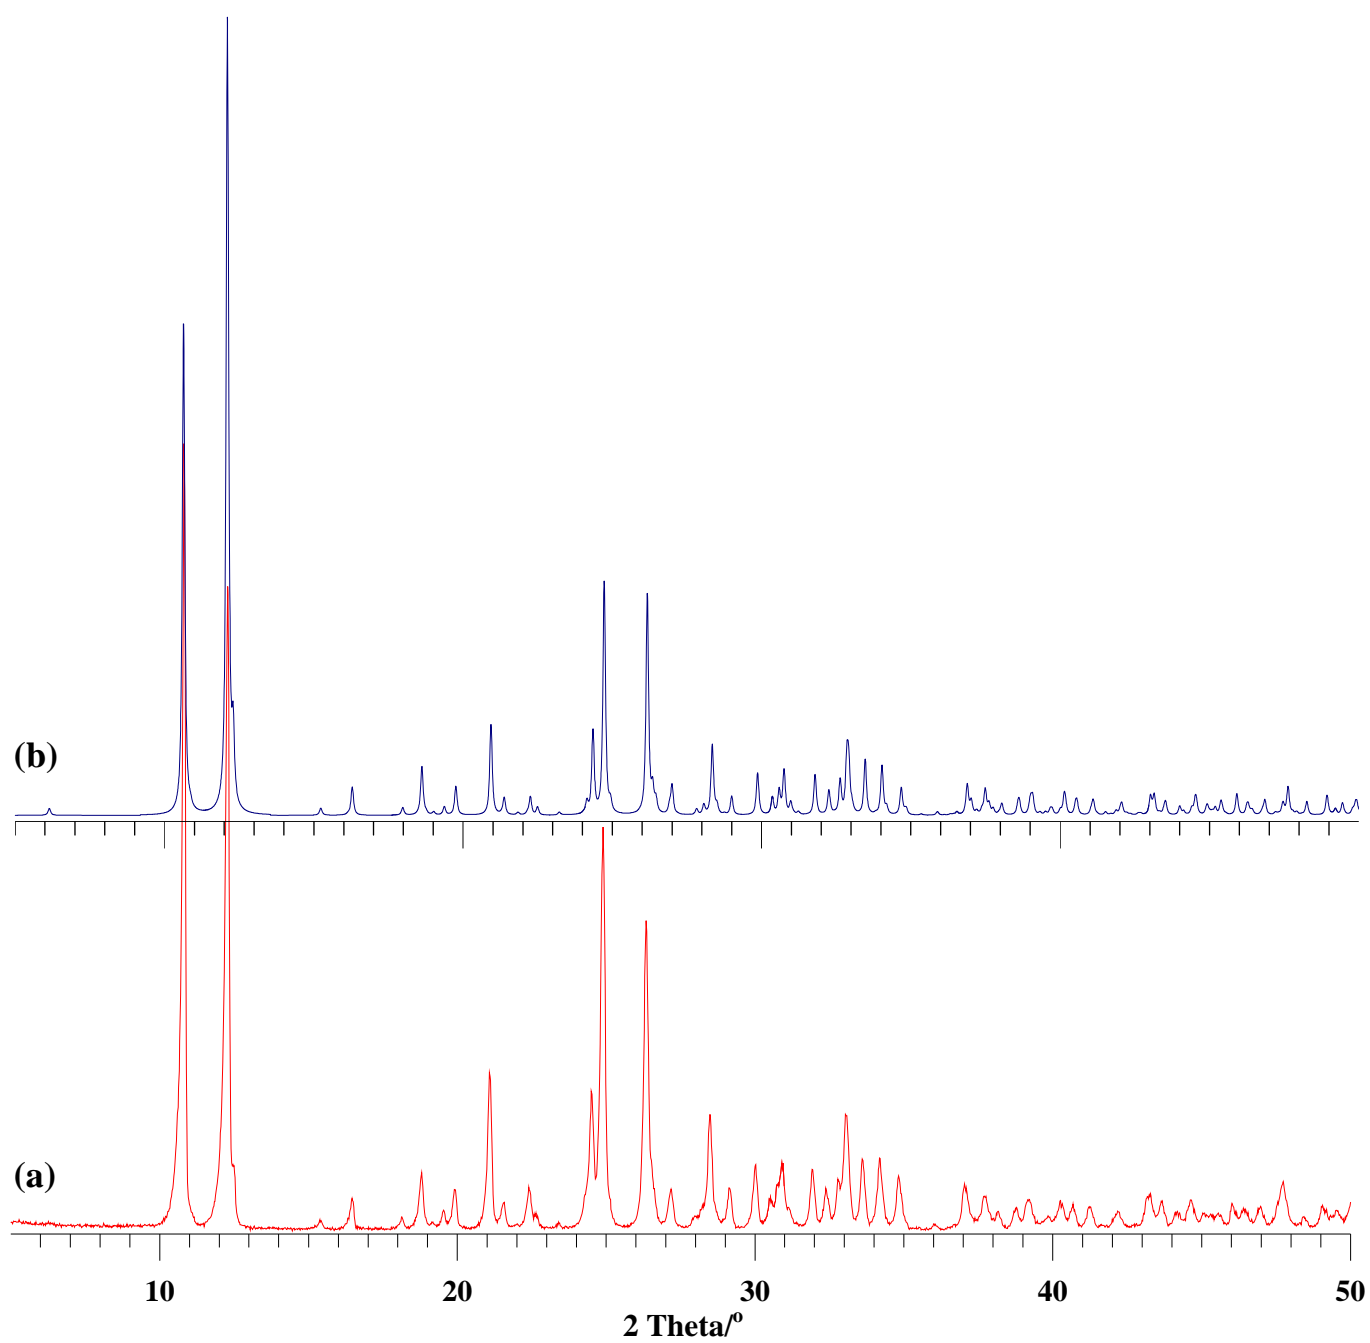

**Figure S1**

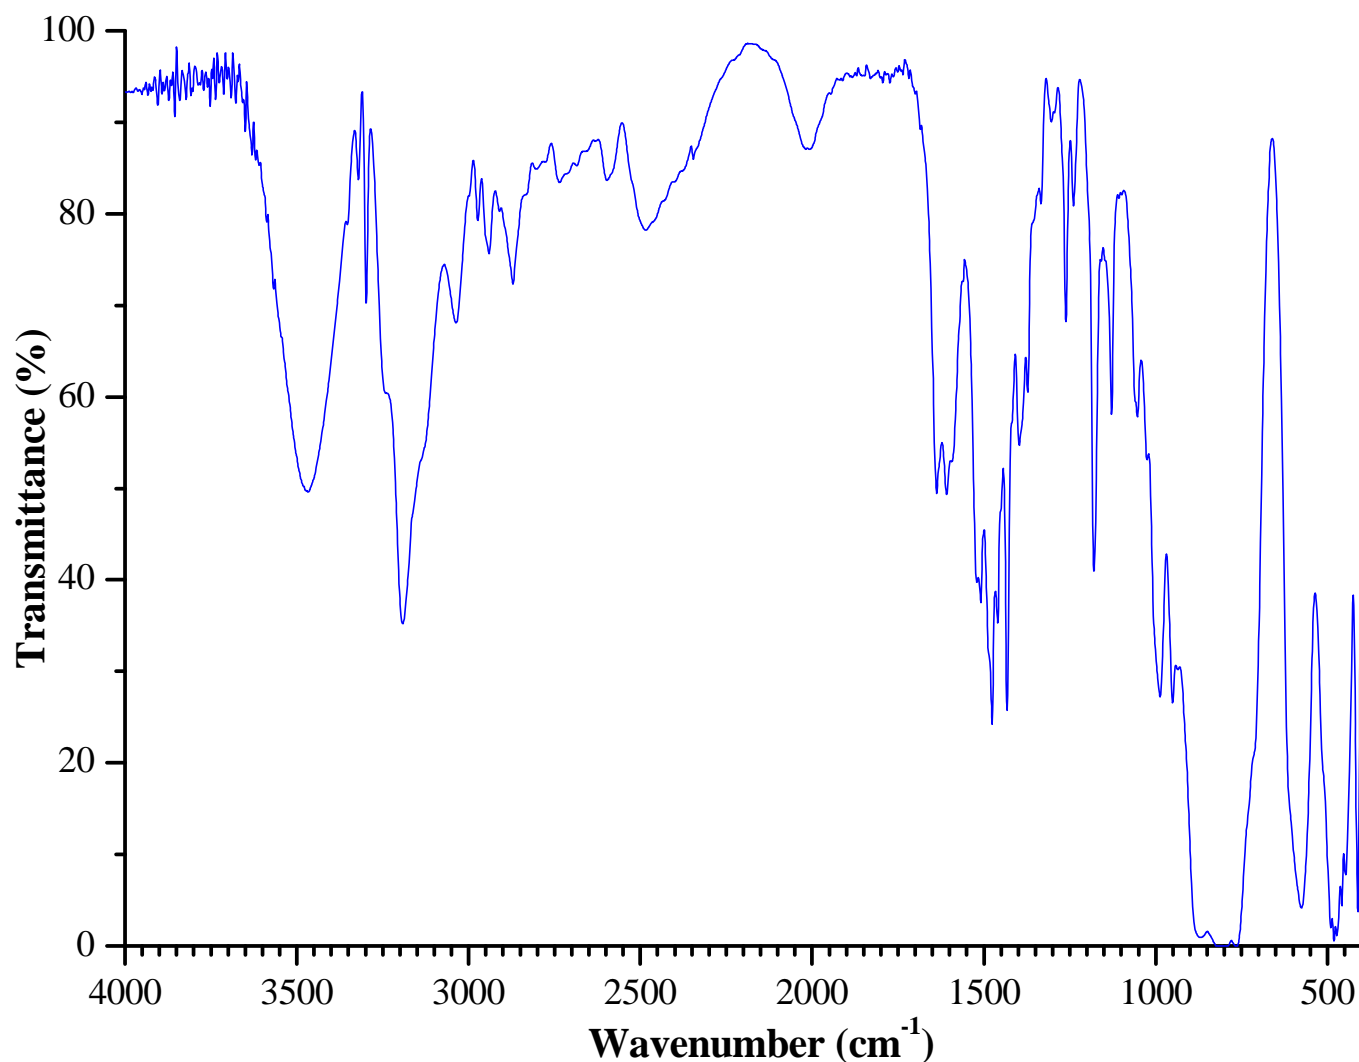

**Figure S2**

The FTIR spectrum of **1** was measured from a powder sample pelletized with KBr on a Jasco FTIR-4200 series spectrophotometer over the range 4000–400  $\text{cm}^{-1}$  at the resolution of 4  $\text{cm}^{-1}$ .

The band centered at 3468  $\text{cm}^{-1}$  is the stretching vibrations of OH and N–H groups. The bands at 3294, 3190 and from 3030 to 2870  $\text{cm}^{-1}$  correspond to the stretching vibrations of the secondary amine N–H, the protonated amine  $\text{R-NH}_3^+$ , and the  $\text{CH}_2$  groups, respectively.<sup>1,4</sup> The bending vibrations of the OH,  $\text{NH}_3^+$  groups are at 1638 and 1605  $\text{cm}^{-1}$ .<sup>3</sup> The bands at 1510, 1478 and 1431  $\text{cm}^{-1}$  are bending vibrations of N–H, C–N and  $\text{CH}_2$  groups, respectively. The band at 1181  $\text{cm}^{-1}$  is assigned to the C–N stretching vibration of the amine.<sup>4</sup> The broad, strong bands from 871 to 753  $\text{cm}^{-1}$  can be assigned to the vibrations of Ge–O and Ge–F bonds.<sup>2</sup> The bands at 574 and 476  $\text{cm}^{-1}$  are attributed to the symmetrical stretching and bending vibration of the Ge–O bonds.<sup>3</sup> The bands at 984 and 951  $\text{cm}^{-1}$  are for the Nb–O vibrations.<sup>5</sup>

1. Zhang, H.-X.; Zhang, J.; Zheng, S.-T.; Yang, G.-Y. *Inorg. Chem.* **2003**, *42*, 6595–6597.
2. Conradsson, T.; Zou, X.; Dadachov, M. S. *Inorg. Chem.* **2000**, *39*, 1716–1720.
3. Beitone, L.; Loiseau, T.; Férey, G. *Inorg. Chem.* **2002**, *41*, 3962–3966.
4. Rao, C. N. R. *Chemical Applications of Infrared Spectroscopy*. Academic Press: New York, 1963, pp 245–281.
5. Andersen, K. B.; Christensen, E.; Berg, R. W.; Bjerrum, N. J.; von Barner, J. H. *Inorg. Chem.* **2000**, *39*, 3449–3454.

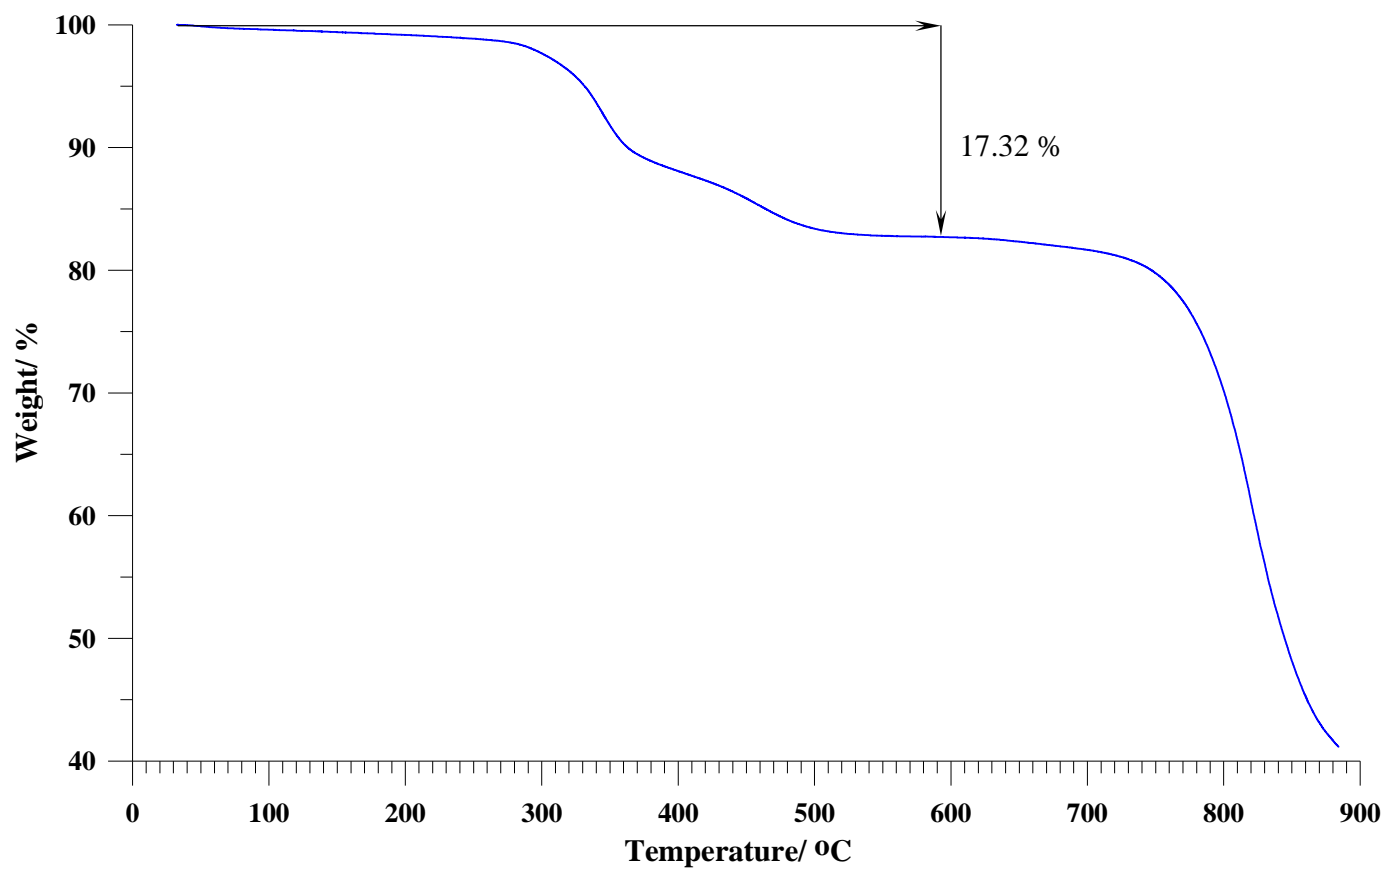

**Figure S3**

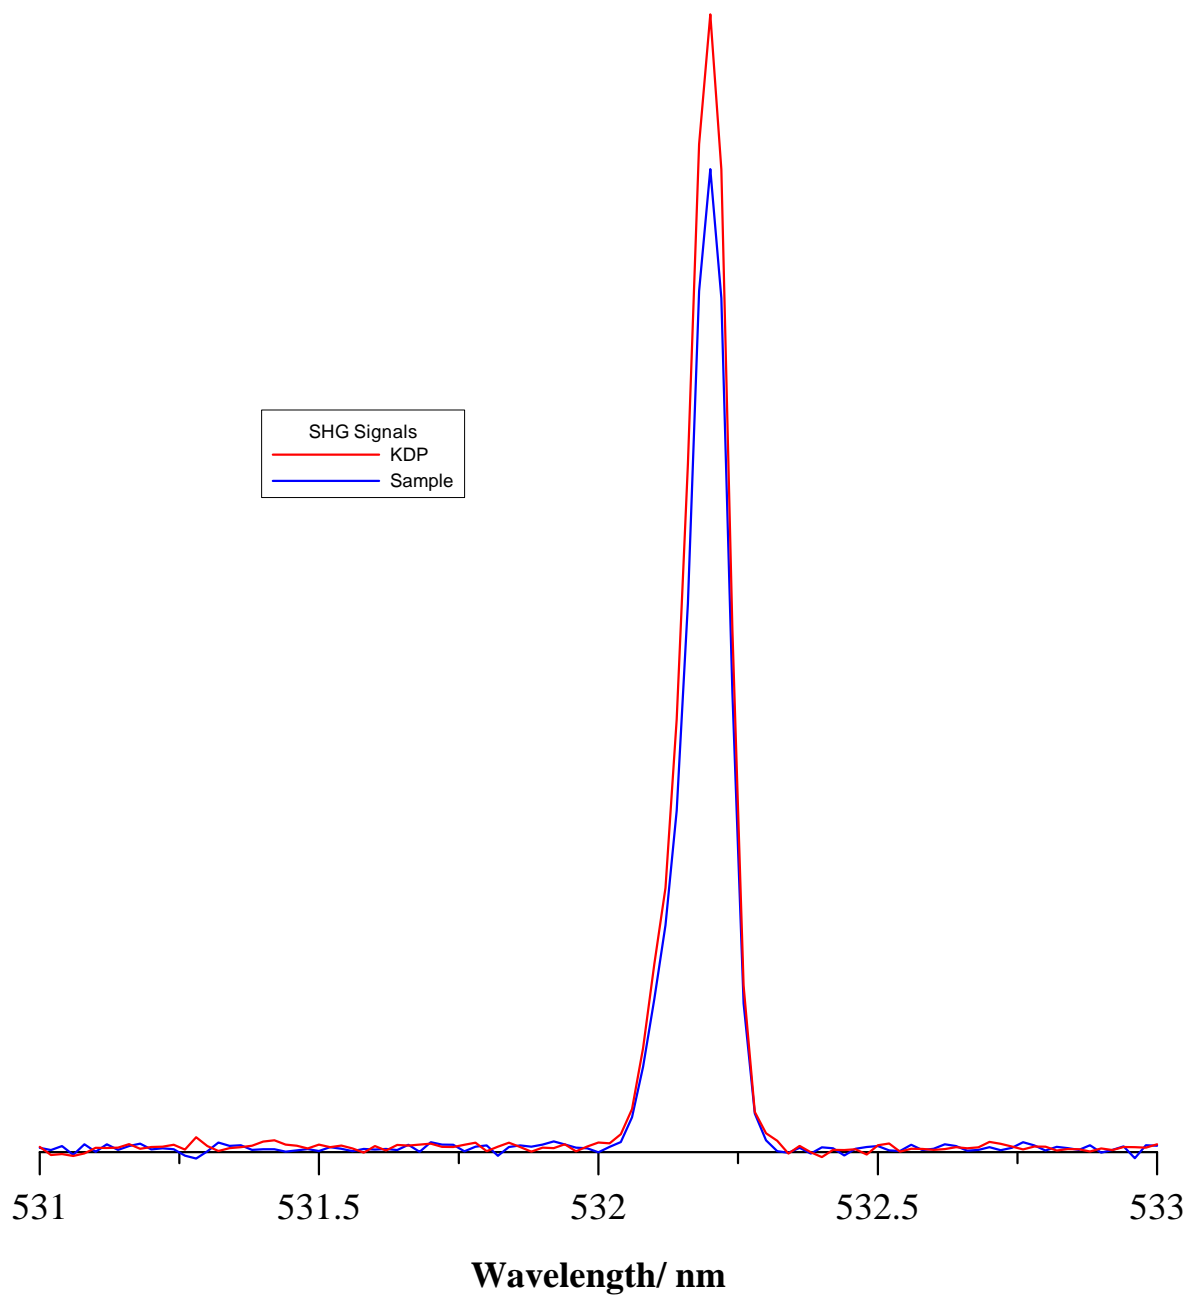

**Figure S4**

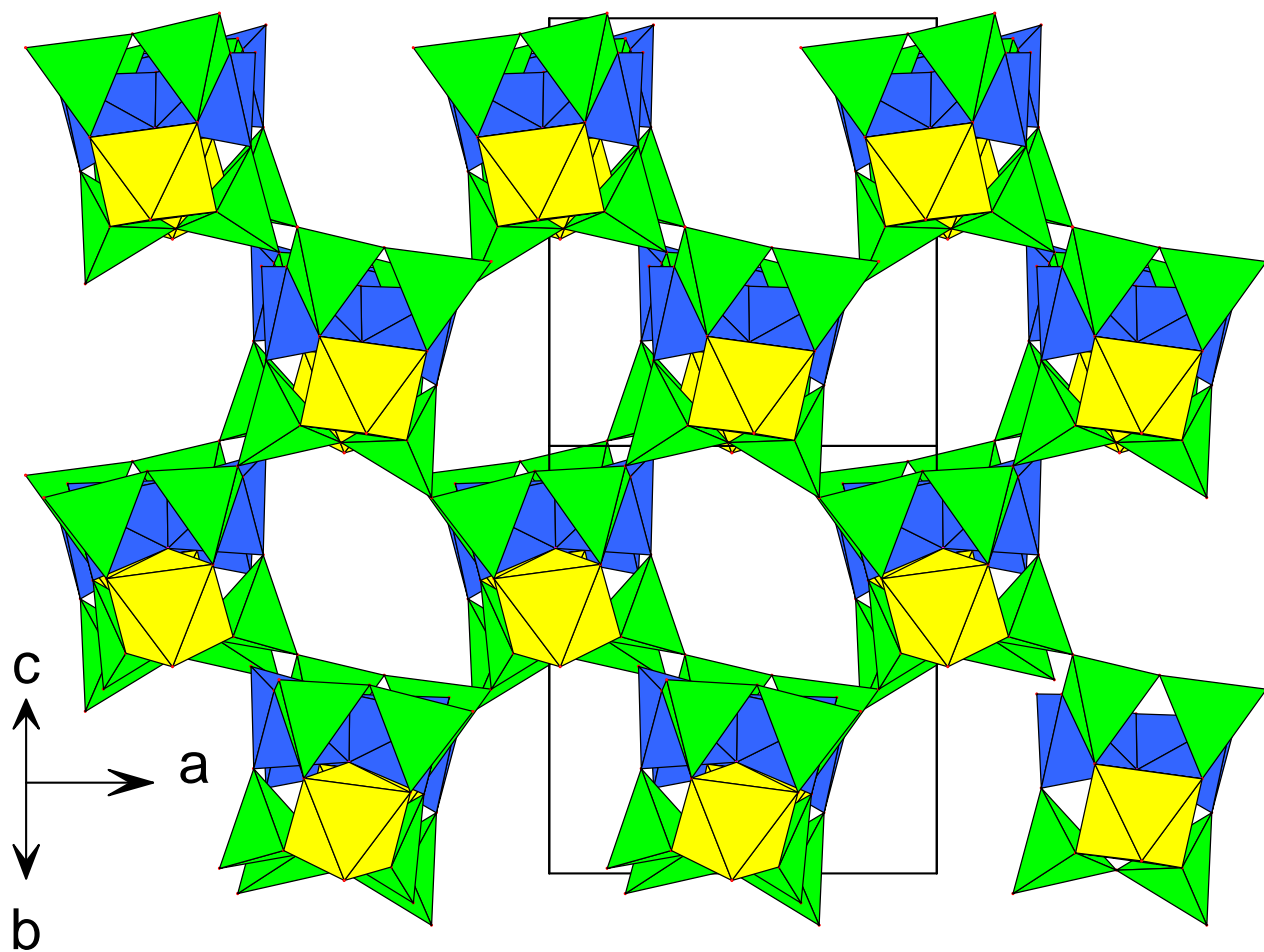

**Figure S5**

**Table S1.** Selected N...O distances showing hydrogen bonding interactions in **1**

|               | Distances/ Å |
|---------------|--------------|
| N(1)...O(1)   | 3.177(7)     |
| N(1)...O(4)   | 3.301(5)     |
| N(1)...O(5)   | 2.954(5)     |
| N(1)...O(14)  | 2.752(5)     |
| N(1)...O(15)  | 3.282(5)     |
| N(1)...O(16)  | 3.334(5)     |
| N(2)...O(3)   | 3.001(4)     |
| N(2)...O(6)   | 3.335(4)     |
| N(2)...O(13)  | 2.796(4)     |
| N(2)...O(15A) | 3.294(4)     |
| N(3)...O(11)  | 3.263(6)     |
| N(3)...O(15B) | 3.113(6)     |
| N(4)...O(7)   | 3.294(6)     |
| N(4)...O(10)  | 3.029(5)     |
| N(4)...O(12)  | 3.042(6)     |
| N(4)...O(15C) | 2.907(5)     |
| N(4)...O(16C) | 2.786(6)     |
